# Supplementary material for: Using Auditory Steady State Responses to Outline the Functional Connectivity in the Tinnitus Brain
Source: PLOS journal article supplement (doi:10.1371/journal.pone.0003720), 2008-11-12
Supplement: S2 (10.1371/journal.pone.0003720.s002) [file journal.pone.0003720.s002]

# Right Parietal - ACC

Intrusiveness = 1

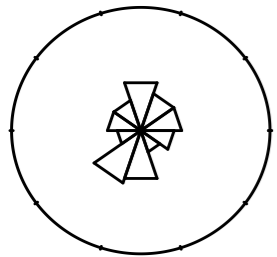

Intrusiveness = 2

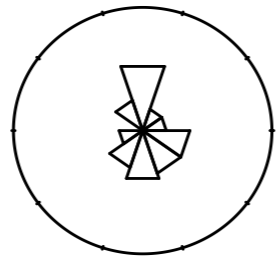

Intrusiveness = 2

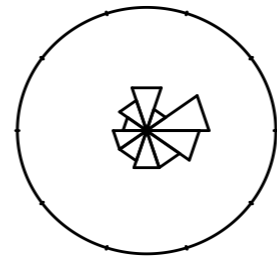

Intrusiveness = 3

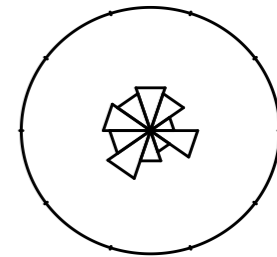

Intrusiveness = 3

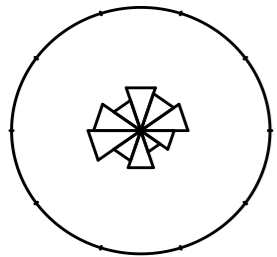

Intrusiveness = 5

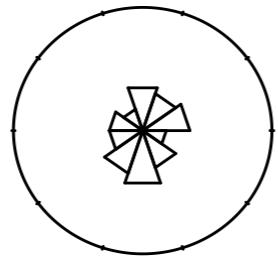

Intrusiveness = 7

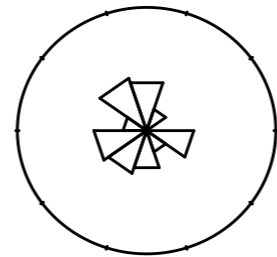

Intrusiveness = 7

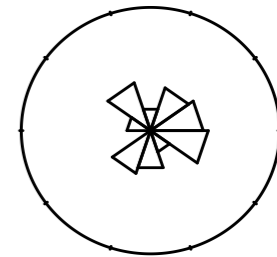

Intrusiveness = 8

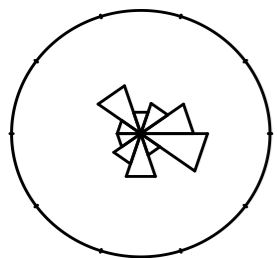

Intrusiveness = 10

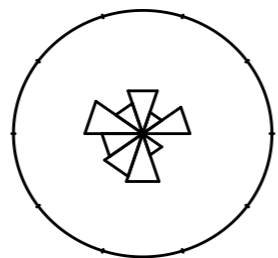

Intrusiveness = 11

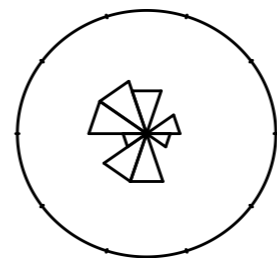

**Figure S2.**

Degrees of the phase differences for the Right Parietal-ACC connectivities. There is a rose plot of the directionalities over 30 trials for each tinnitus subjects. Rose plots are sorted according to the tinnitus intrusiveness.
